# Supplementary material for: Progress and perspectives on halide lithium conductors for all-solid-state lithium batteries
Source: Royal Society of Chemistry journal article supplement (doi:10.1039/c9ee03828k), 2020-01-01
Supplement: c9ee03828k1.pdf [file c9ee03828k1.pdf]

## Supporting Information

### Progress and Perspectives of Halide-based Lithium Conductors for All-Solid-State Batteries

*Xiaona Li,<sup>+</sup> Jianwen Liang,<sup>+</sup> Xiaofei Yang, Keegan R. Adair, Changhong Wang, Feipeng Zhao, and Xueliang Sun\**

Table S1. Parameters of the selected electrode systems.

| Electrode materials system | Average Voltage (V) | Cathode                             |                                            |                              | Anode                               |                                            |                              |
|----------------------------|---------------------|-------------------------------------|--------------------------------------------|------------------------------|-------------------------------------|--------------------------------------------|------------------------------|
|                            |                     | Press Density (g cm <sup>-3</sup> ) | Reversible Capacity (mAh g <sup>-1</sup> ) | Initial Coulombic Efficiency | Press Density (g cm <sup>-3</sup> ) | Reversible Capacity (mAh g <sup>-1</sup> ) | Initial Coulombic Efficiency |
| LCO/Li                     | 3.95                | 4.2 (96.5wt%)                       | 190                                        | 97%                          | 0.53                                | 3860                                       | 100%                         |
|                            |                     | 4.031 (90wt%)                       |                                            |                              |                                     |                                            |                              |
|                            |                     | 3.901 (90wt%)                       |                                            |                              |                                     |                                            |                              |
| Li rich/Li                 | 4                   | 2.7 (96.5wt%)                       | 300                                        | 90%                          | 0.53                                | 3860                                       | 100%                         |
|                            |                     | 2.6285 (90wt%)                      |                                            |                              |                                     |                                            |                              |
|                            |                     | 2.5735 (90wt%)                      |                                            |                              |                                     |                                            |                              |
| NMC811/Li                  | 3.8                 | 3.5 (96.5wt%)                       | 210                                        | 90%                          | 0.53                                | 3860                                       | 100%                         |
|                            |                     | 3.3765 (90wt%)                      |                                            |                              |                                     |                                            |                              |
|                            |                     | 3.2815 (90wt%)                      |                                            |                              |                                     |                                            |                              |
| S/Li                       | 2                   | 0.8609 (70wt%)                      | 1336                                       | 100%                         | 0.53                                | 3860                                       | 100%                         |
|                            |                     | 0.7077 (60wt%)                      |                                            |                              |                                     |                                            |                              |
|                            |                     | 0.6007 (50wt%)                      |                                            |                              |                                     |                                            |                              |

The reversible capacity of S cathode is 80% of its theoretical capacity. 15% porosity is considered to moderate volume change. The mass ratio of S: PVDF: Super P = x% : 2(1-x%)/3 : (1-x%)/3. The density of PVDF and Super P is 0.8 g cm<sup>-3</sup> and 0.16 g cm<sup>-3</sup>, respectively.

Table S2. Parameters of the selected SSE systems.

| Electrolyte                       | Density (g cm <sup>-3</sup> ) |
|-----------------------------------|-------------------------------|
| LGPS                              | 2.05                          |
| Li <sub>3</sub> InCl <sub>6</sub> | 2.59                          |
| LLZO                              | 5.07                          |
| PEO                               | 1.24                          |
| Li <sub>3</sub> ErCl <sub>6</sub> | 3.07                          |
| Li <sub>3</sub> ScCl <sub>6</sub> | 2.18                          |

Table S3. Typical technological parameters of an NMC811/Li pouch cell with a fixed size of 138 mm × 81.8 mm × 7.13 mm.

| Component of Cell | Parameter                                                      | Value    |
|-------------------|----------------------------------------------------------------|----------|
| Cathode           | Material                                                       | NMC811   |
|                   | Reversible capacity (mAh g <sup>-1</sup> )                     | 210      |
|                   | Initial Coulombic efficiency (%)                               | 90       |
|                   | Unilateral areal density (mg cm <sup>-2</sup> each side of Al) | 22.925   |
|                   | Active material ratio (%)                                      | 96.5     |
|                   | Press density (g cm <sup>-3</sup> )                            | 3.5      |
|                   | Unilateral thickness (μm)                                      | 65.5     |
|                   | Thickness of Al (μm)                                           | 16       |
|                   | Length (mm)                                                    | 120      |
|                   | Width (mm)                                                     | 73       |
|                   | layer                                                          | 22       |
| Anode             | Material                                                       | Li       |
|                   | Reversible capacity (mAh g <sup>-1</sup> )                     | 3860     |
|                   | Initial Coulombic efficiency (%)                               | 100      |
|                   | Unilateral areal density (mg cm <sup>-2</sup> each side of Cu) | 2.407125 |
|                   | Active material ratio (%)                                      | 100      |
|                   | Press density (g cm <sup>-3</sup> )                            | 0.53     |
|                   | Unilateral thickness (μm)                                      | 45.41745 |
|                   | Thickness of Cu (μm)                                           | 8        |
|                   | Length (mm)                                                    | 123      |
|                   | Width (mm)                                                     | 76       |
|                   | layer                                                          | 23       |

|              |                                                    |                            |
|--------------|----------------------------------------------------|----------------------------|
| Electrolyte  | Material                                           | $\text{Li}_3\text{InCl}_6$ |
|              | Thickness ( $\mu\text{m}$ )                        | 30                         |
|              | Length ( $\mu\text{m}$ )                           | 126                        |
|              | Width ( $\mu\text{m}$ )                            | 76                         |
|              | layer                                              | 44                         |
| Sealing film | Thickness ( $\mu\text{m}$ )                        | 152                        |
| Cell         | Voltage (V)                                        | 3.8                        |
|              | Capacity (Ah)                                      | 17.90658                   |
|              | Mass (g)                                           | 165.879                    |
|              | Volume (L)                                         | 0.0805                     |
|              | Gravimetric energy density ( $\text{Wh kg}^{-1}$ ) | 410.2084                   |
|              | Volumetric energy density ( $\text{Wh L}^{-1}$ )   | 845.2811                   |

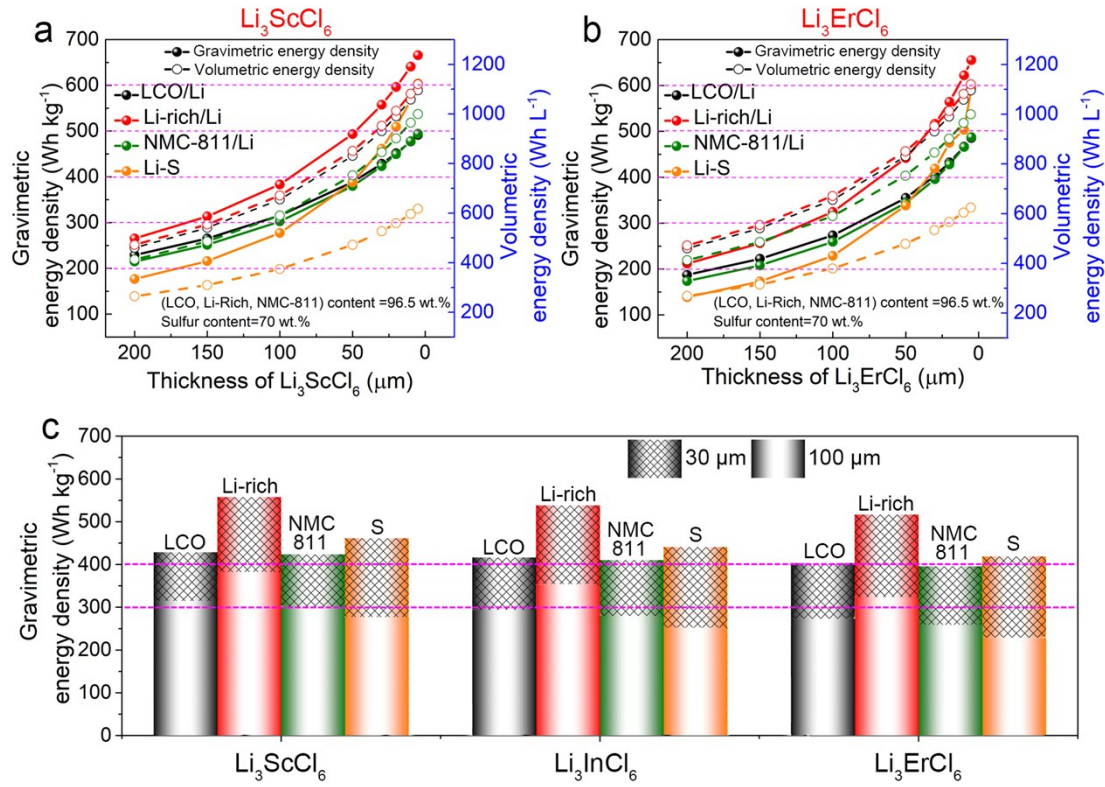

Figure S1. Gravimetric/volumetric energy densities of ASSLBs as a function of halide SSE thickness. (a)  $\text{Li}_3\text{ScCl}_6$  and (b)  $\text{Li}_3\text{ErCl}_6$ . (c) The gravimetric energy densities of ASSLBs based on two representative thicknesses (30  $\mu\text{m}$  and 100  $\mu\text{m}$ ) of SSE; the black, red, green, and yellow colors refer to LCO, Li-rich, NMC811, and S cathodes, respectively. The weight percentage of

the active materials is 96.5 wt% for LCO, Li-rich, and NMC-811 cathodes and 70 wt% for S cathode. The calculation details are provided in the Supplemental Information.

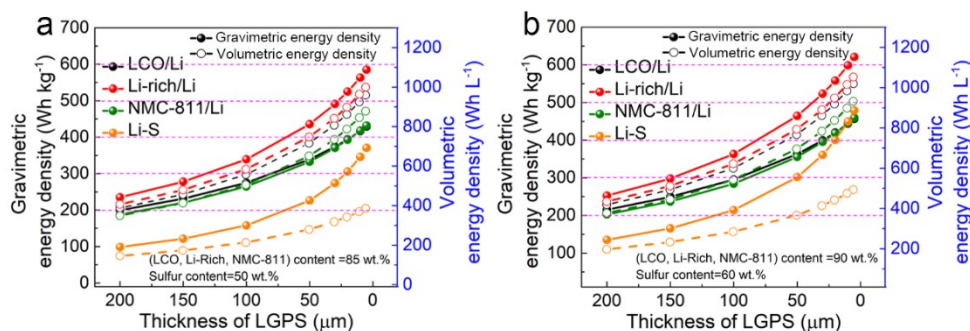

Figure S2. Gravimetric/volumetric energy densities of ASSLBs as a function of LGPS SSE thickness. (a) The weight percentage of the active materials is 85 wt% for LCO, Li-rich, and NMC811 cathodes and 50 wt% for S cathode, (b) the weight percentage of the active materials is 90 wt% for LCO, Li-rich, and NMC811 cathodes and 60 wt% for S cathode.

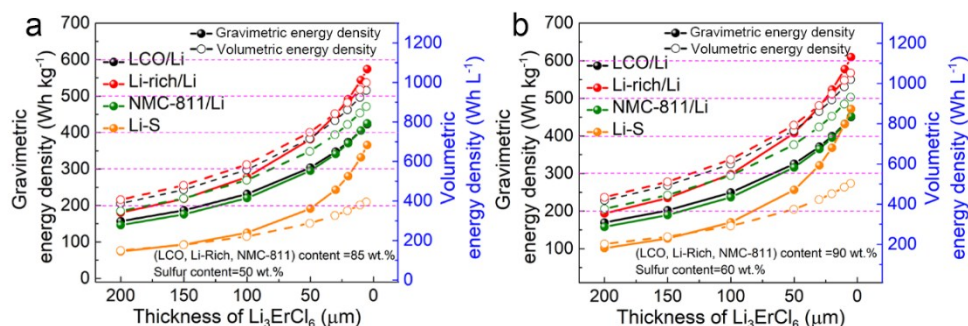

Figure S3. Gravimetric/volumetric energy densities of ASSLBs as a function of  $\text{Li}_3\text{ErCl}_6$  SSE thickness. (a) The weight percentage of the active materials is 85 wt% for LCO, Li-rich, and NMC811 cathodes and 50 wt% for S cathode, (b) the weight percentage of the active materials is 90 wt% for LCO, Li-rich, and NMC811 cathodes and 60 wt% for S cathode.

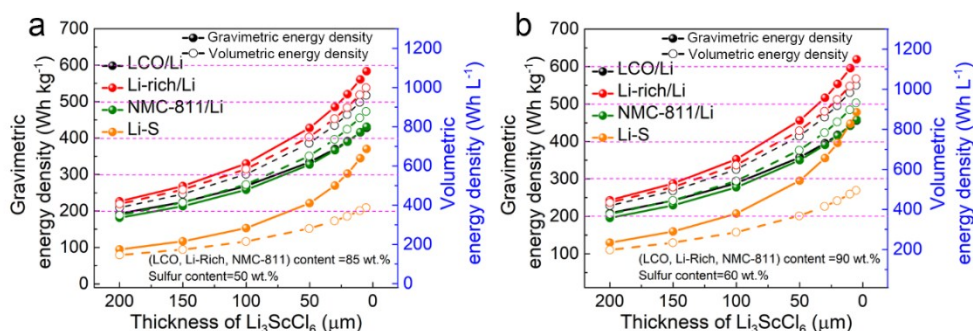

Figure S4. Gravimetric/volumetric energy densities of ASSLBs as a function of  $\text{Li}_3\text{ScCl}_6$  SSE thickness. (a) The weight percentage of the active materials is 85 wt% for LCO, Li-rich, and NMC811 cathodes and 50 wt% for S cathode, (b) the weight percentage of the active materials is 90 wt% for LCO, Li-rich, and NMC811 cathodes and 60 wt% for S cathode.

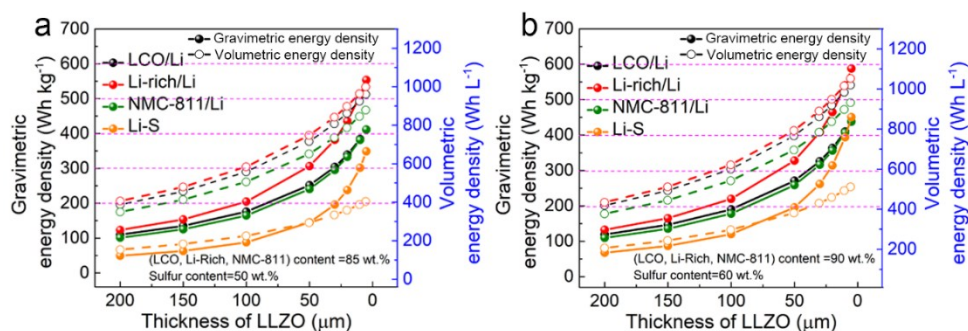

Figure S5. Gravimetric/volumetric energy densities of ASSLBs as a function of LLZO SSE thickness. (a) The weight percentage of the active materials is 85 wt% for LCO, Li-rich, and NMC811 cathodes and 50 wt% for S cathode, (b) the weight percentage of the active materials is 90 wt% for LCO, Li-rich, and NMC811 cathodes and 60 wt% for S cathode.

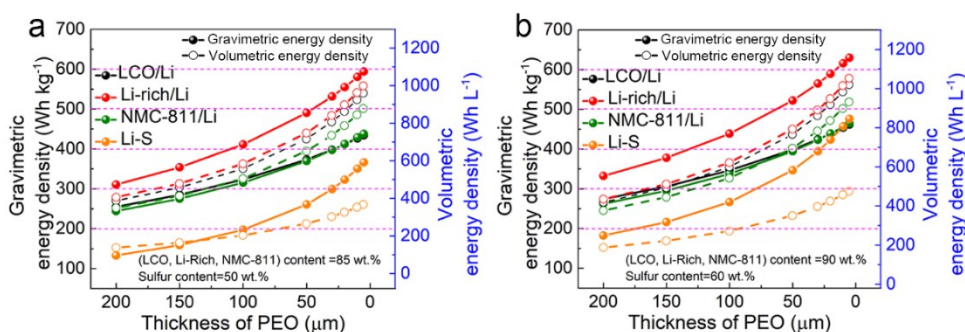

Figure S6. Gravimetric/volumetric energy densities of ASSLBs as a function of PEO SSE thickness. (a) The weight percentage of the active materials is 85 wt% for LCO, Li-rich, and

NMC811 cathodes and 50 wt% for S cathode, (b) the weight percentage of the active materials is 90 wt% for LCO, Li-rich, and NMC811 cathodes and 60 wt% for S cathode.
